# Supplementary material for: Transferring Surgical Expertise: Analyzing the Learning Curve of Robotic Cardiac Surgery Operative Time Reduction When Surgeon Moves from One Experienced Center to Another
Source: MDPI journal article supplement (doi:10.3390/jcdd11030081), 2024-02-29

**Supplementary Figure S1:** the robotic team ergonomics at Weill Cornell Medicine.

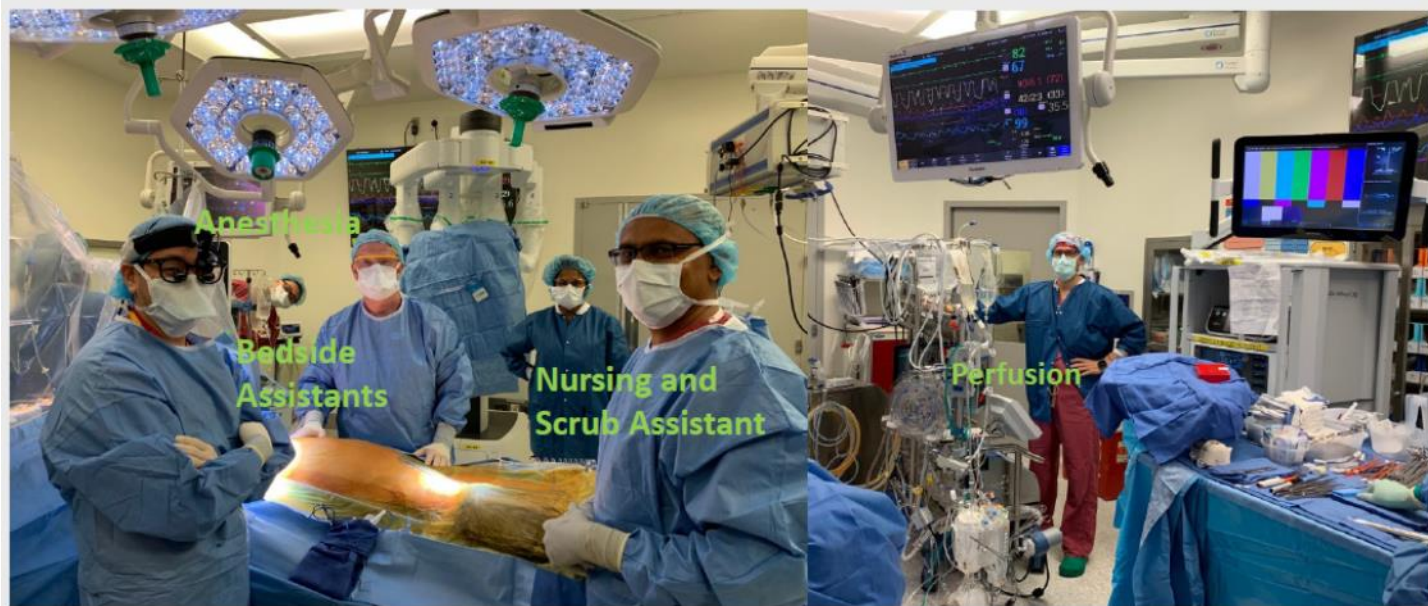

Supplementary Figure S2: Postoperative outcomes

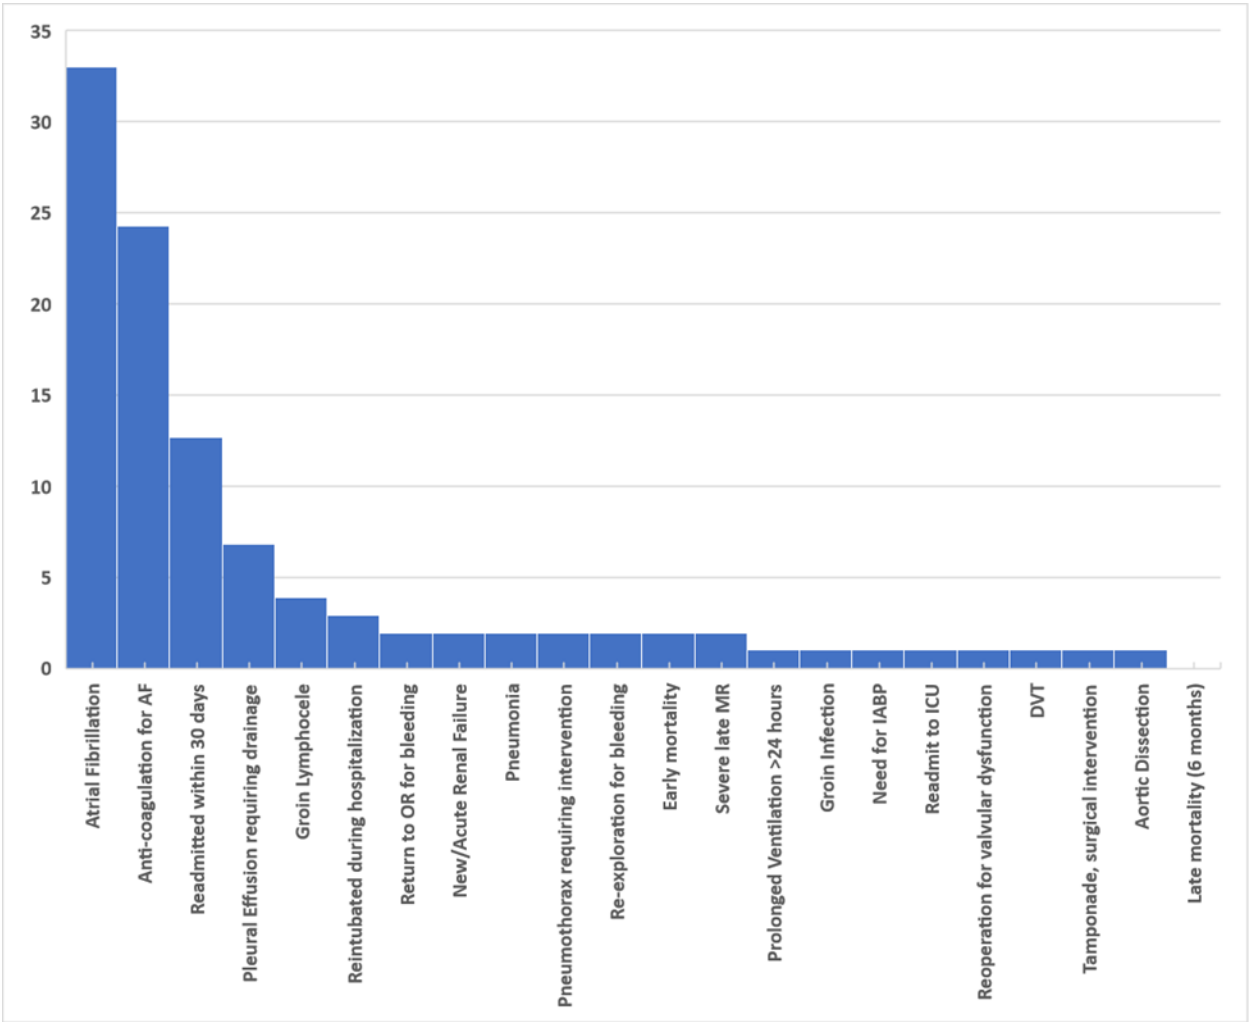

Supplement: s1 [file s1]
